# Supplementary material for: Prevalence, Virulence, and Antimicrobial Resistance of Major Mastitis Pathogens Isolated from Taiwanese Dairy Farms
Source: MDPI journal article supplement (doi:10.3390/antibiotics13010036), 2023-12-30
Supplement: s1 [file s1]

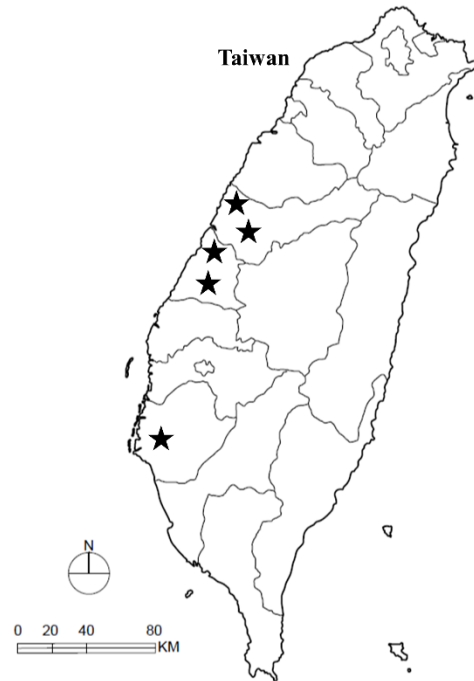

**Figure S1:** Milk samples collection sites in Taiwan during 2020-2021.

Two farms in Taichung (24.4040 N, 120.6482 E and 24.5263 N, 120.7486E, respectively), two farms in Chunghwa, (24.0288 N, 120.3624 E and 24.1376 N, 120.6666 E, respectively), and one farm in Tainan. (23.3327 N, 120.3340 E).

**Table S1.** Oligonucleotide sequences, primers, and targets for Polymerase Chain Reaction amplification of antimicrobial resistance genes

| Antibiotics class            | Genes       | Primers                       | Oligonucleotide sequence (5'→3')          | Amplified product (bp) | Annealing temperature (°C) | References                       |
|------------------------------|-------------|-------------------------------|-------------------------------------------|------------------------|----------------------------|----------------------------------|
| (Aminoglycoside)<br>Neomycin | <i>aph</i>  | <i>aph</i> (3)-I-F            | ATGGGCTCGCGATAATGTC                       | 600                    | 52                         | Maynard <i>et al.</i> (2003)     |
|                              | (3)-I       | <i>aph</i> (3)-I-R            | CTCACCGAGGCAGTTCCAT                       |                        |                            |                                  |
|                              | <i>aph</i>  | <i>aph</i> (3)-II-F           | ATGGGCTCGCGATAATGTC                       | 680                    | 54                         | Maynard <i>et al.</i> (2003)     |
|                              | (3)-II      | <i>aph</i> (3)-II-R           | CTCACCGAGGCAGTTCCAT                       |                        |                            |                                  |
| (Beta-lactamase)             | <i>mecA</i> | <i>mecA</i> -1                | AAAATCGATGGTAAAGGTTGGC                    | 533                    | 55                         | Frey <i>et al.</i> (2013)        |
| Oxacillin                    |             | <i>mecA</i> -2                | AGTTCTGCAGTACCGGATTTGC                    |                        |                            |                                  |
| Ampicillin                   | <i>blaZ</i> | <i>blaZ</i> -F                | CAGTTCACATGCCAAAGAG                       | 772                    | 48                         | Schnellmann <i>et al.</i> (2006) |
| Ceftiofur                    |             | <i>blaZ</i> -R                | TACACTCTTGGCGGTTTC                        |                        |                            |                                  |
| Cephalothin                  | <i>ampC</i> | <i>ampC</i> -F <i>ampC</i> -R | ATGATGAAAAAATCGTTATGC                     | 1,143                  | 53                         | Winokur <i>et al.</i> (2001)     |
| Cefuroxime                   |             |                               | TTGCAGCTTTTCAAGAATGCGC                    |                        |                            |                                  |
| Bacitracin                   | <i>bcrA</i> | <i>bcrA</i> -F                | CCGCAATGAAAATGATGTTG                      | 584                    | 49                         | Matos <i>et al.</i> (2009)       |
|                              |             | <i>bcrA</i> -R                | TGCGGCTATCTTACCATCTG                      |                        |                            |                                  |
|                              | <i>bcrB</i> | <i>bcrB</i> -F                | AAAGAAACCGACTGCTGATA                      | 489                    | 48                         | Matos <i>et al.</i> (2009)       |
|                              |             | <i>bcrB</i> -R                | GCTTACTTGTATAGCAGAGA                      |                        |                            |                                  |
| Tetracycline                 | <i>tetM</i> | <i>tetM</i> -F                | AGGGCATCAAGCAACATTTTC                     | 366                    | 49                         | Pyatov <i>et al.</i> (2017)      |
|                              |             | <i>tetM</i> -R                | TCGAGGTCCGTCTGAACTTT                      |                        |                            |                                  |
|                              | <i>tetO</i> | <i>tetO</i> -F                | TAGCGGAACATTGCATTTGA                      | 290                    | 48                         | Pyatov <i>et al.</i> (2017)      |
|                              |             | <i>tetO</i> -R                | TTTCTGTAAGTGCCCCAAGC                      |                        |                            |                                  |
|                              | <i>tetA</i> | <i>tetA</i> -F                | TGTCCGACAAGTTGCATGAT                      | 178                    | 49                         | Pyatov <i>et al.</i> (2017)      |
|                              |             | <i>tetA</i> -R                | CCTTGAACGGCCTCAATTT                       |                        |                            |                                  |
|                              | <i>tetB</i> | <i>tetB</i> -F                | CTCCTTGGCTTGGA AAAATG                     | 229                    | 50                         | Pyatov <i>et al.</i> (2017)      |
|                              |             | <i>tetB</i> -R                | AACCAACCGAACCACCTTCAC                     |                        |                            |                                  |
|                              | 16S rRNA    | Nossa F<br>Nossa R            | GGAGGCAGCAGTRRGAAT<br>CTACCRGGGTATCTAATCC | 458                    | 58                         | Nossa <i>et al.</i> (2010)       |

**Table S2.** Oligonucleotide sequences, primer names, and conditions of Polymerase Chain Reaction amplification for target virulence genes

| Genes                       | Primers           | Oligonucleotide sequence (5'→3') | Amplified product (bp) | Annealing temperature (°C) | References                    |
|-----------------------------|-------------------|----------------------------------|------------------------|----------------------------|-------------------------------|
| <i>Staphylococcus</i> spp., |                   |                                  |                        |                            |                               |
| <i>coa</i>                  | <i>coa</i> -F     | ATAGAGATGCTGGTACAGG              | 544                    | 48                         | Kalorey <i>et al.</i> (2007)  |
|                             | <i>coa</i> -R     | GCTTCCGATTGTTTCGATGC             |                        |                            |                               |
| <i>spa</i>                  | <i>spa</i> -F     | CAAGCACCAAAAAGAGGAA              | 487                    | 46                         | Kalorey <i>et al.</i> (2007)  |
|                             | <i>spa</i> -R     | CACCAGGTTTAACGACAT               |                        |                            |                               |
| <i>sea</i>                  | <i>sea</i> -F     | GCAGGGAACAGCTTTAGGC              | 521                    | 53                         | Løvseth <i>et al.</i> (2004)  |
|                             | <i>sea</i> -R     | GTTCTGTAGAAGTATGAAACACG          |                        |                            |                               |
| <i>hla</i>                  | <i>hla</i> -F     | GGTTTAGCCTGGCCTTC                | 550                    | 49                         | Booth <i>et al.</i> (2001)    |
|                             | <i>hla</i> -R     | CATCACGAACTCGTTCG                |                        |                            |                               |
| <i>fib</i>                  | <i>fib</i> -F     | CTACAACTACAATTGCCGTCAACAG        | 404                    | 56                         | Tristan <i>et al.</i> (2003)  |
|                             | <i>fib</i> -R     | GCTCTTGTAAGACCATTTTCTTCAC        |                        |                            |                               |
| <i>Streptococcus</i> spp.,  |                   |                                  |                        |                            |                               |
| <i>bac</i>                  | <i>bac</i> -F     | TGTAAAGGACGATAGTGTGAAGAC         | 530                    | 54                         | Dmitriev <i>et al.</i> (2002) |
|                             | <i>bac</i> -R     | CATTTGTGATTCCCTTTTGC             |                        |                            |                               |
| <i>bca</i>                  | <i>bca</i> -F     | TAACAGTTATGATACTTCACAGAC         | 535                    | 56                         | Dmitriev <i>et al.</i> (2002) |
|                             | <i>bca</i> -R     | ACGACTTTCTTCCGTCCACTTAGG         |                        |                            |                               |
| <i>lmb</i>                  | <i>lmb</i> -F     | ACCGTCTGAAATGATGTGG              | 572                    | 48                         | Dmitriev <i>et al.</i> (2002) |
|                             | <i>lmb</i> -R     | GATTGACGTTGTCTTCTGC              |                        |                            |                               |
| <i>hylB</i>                 | <i>hylB</i> -F    | ACAAATGGAACGACGTGACTAT           | 346                    | 51                         | Dmitriev <i>et al.</i> (2002) |
|                             | <i>hylB</i> -R    | CACCAATTGGCAGAGCCT               |                        |                            |                               |
| <i>scpB</i>                 | <i>scpB</i> -F    | CCAAGACTTCAGCCACAAGG             | 591                    | 53                         | Dmitriev <i>et al.</i> (2002) |
|                             | <i>scpB</i> -R    | CAATTCAGCCAATAGCAGC              |                        |                            |                               |
| coliforms                   |                   |                                  |                        |                            |                               |
| <i>ompC</i>                 | <i>ompC</i> -F    | TTAGAACTGGTAAACCAGACCCA          | 1,104                  | 54                         | Zhang <i>et al.</i> (2018)    |
|                             | <i>ompC</i> -R    | ATGAAAGTTAAAGTACTGTCCCTCC        |                        |                            |                               |
| <i>fimH</i>                 | <i>fimH</i> -F    | TGCAGAACGGATAAGCCGTGG            | 508                    | 57                         | Bicalho <i>et al.</i> (2010)  |
|                             | <i>fimH</i> -R    | GCAGTCACCTGCCCTCCGTA             |                        |                            |                               |
| <i>Ecs3703</i>              | <i>Ecs3703</i> -F | TTGACATCATCAATCACCAATG           | 693                    | 49                         | Zhang <i>et al.</i> (2018)    |
|                             | <i>Ecs3703</i> -R | TCAATGTTGGACCGAATGTG             |                        |                            |                               |
| <i>ompF</i>                 | <i>ompF</i> -F    | TTTCCAAGGGTAACGGTGAA             | 382                    | 50                         | Zhang <i>et al.</i> (2018)    |
|                             | <i>ompF</i> -R    | CCATCAACCAGACCAAAGAAG            |                        |                            |                               |
| <i>colV</i>                 | <i>colV</i> -F    | GGAAATGACCTGAATGCTGG             | 399                    | 52                         | Zhang <i>et al.</i> (2018)    |
|                             | <i>colV</i> -R    | CCGCTCATGCATCAGTACC              |                        |                            |                               |
